# Supplementary material for: Diversity of Tartary Buckwheat (Fagopyrum tataricum) Landraces from Liangshan, Southwest China: Evidence from Morphology and SSR Markers
Source: MDPI journal article supplement (doi:10.3390/agronomy12051022), 2022-04-24
Supplement: s1 [file s1]

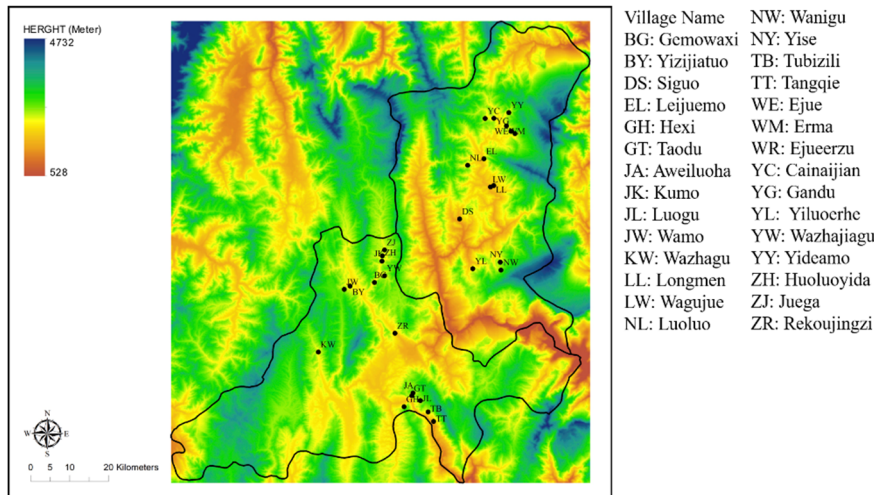

**Figure S1.** Sampling location of 29 populations (villages) of Tartary buckwheat (*Fagopyrum tataricum*) landraces, in Meigu and Zhaojue county of Sichuan Province, China

**Table S1 Information of 80 primers**

| No. | Forward Primer        | Reverse Primer         |
|-----|-----------------------|------------------------|
| P1  | TTTCTGTCCTGGACTTGGTAA | CCCTTTCACCTTCAACGTCT   |
| P2  | TCCTAGCCTCTTAGGTTAAGG | TTCTAACCGATGTCAAACCAC  |
| P3  | ATCCACATTGACATAGCCAGA | GATTATTAGTCCACCCACCCT  |
| P4  | TCCAATAGCCAATAGTACATG | GACCTAATTAACCGTTAGCACA |
| P5  | CAAAAGAAAAGTGCCGAAGT  | TTATGTCACCGCCATTGTT    |
| P6  | GGTATGACACTTTGCGGTATT | GTATCGACAAGAAACATCCAGA |
| P7  | CAATGGGATCGATTCAGGAC  | GAATGAGAATGGGAATGGGA   |
| P8  | AAAGAGGTGGATGGGAGCTT  | CAGAGAATTGGCGGAAAGAG   |
| P9  | TCAGCTTGACATTTGCGTT   | GGATGACGTCCGTAACCTGGG  |
| P10 | GGGTCAAAACGTTGAGTCGT  | CACCCACGGATGTGACATAA   |
| P11 | GGACCCTAGTAGGACGGCTT  | TGACTCTCCATCCATGCTTGT  |
| P12 | GAACCTGTAGGCCTTTTGCG  | AAACCAGCTGGAGCAAGAGA   |
| P13 | CTCAAAGGATGCCATTGTAAC | GACCTTGAGAACGCCTTGAC   |
| P14 | CCACTGGAACGTGTGCTAAG  | GGGGAAACTATTTGGTGCAA   |
| P15 | CACCTGCTACAATACTCTCA  | GCTTAATCAACAGTAGGCAC   |

---

|     |                           |                          |
|-----|---------------------------|--------------------------|
| P16 | GGGCATCAAAGTTGAATACG      | GTCTAAGGTCGCACATTGAT     |
| P17 | CAATGTTTTTCGCAGTCATGT     | TGCGGTGTTTCAAAGTATTG     |
| P18 | ATAAACAGTAACCGCCATCT      | TTAATCAGACCTAGCCCCAT     |
| P19 | TAAGCAAAATGAGATGGTGGT     | ATAGCTCTGAGAAGCCGAAG     |
| P20 | AGCATTGAGCCTAAACATGA      | CAAAACGCCTGATTTCTAC      |
| P21 | CAGTGCCGTCAGTAGTTC        | GAGCTTATTGGACTCGCTTG     |
| P22 | GTAGGAGGGTTGTATTGTGG      | ATTTCTCTTCACACGAGCTT     |
| P23 | ATCTTTCTGTCCTGGACTTGGT    | GCAAGAAAAACAGGGGAGCA     |
| P24 | GCCTCCTACTAGCCCTTCCA      | AGCTGACCCTTGTGTCTCCC     |
| P25 | GTTGGCTGACGAAGACCGAC      | AAAGAGAGCGAGAGGCACTG     |
| P26 | ACCGAGATAGAGACCGAGAT      | CAAATAACATACCCAAAGA      |
| P27 | GACCCTTCGTTAGTAGACCA      | GGAGGAAGAGAAGAGAAAGT     |
| P28 | GGGTGGTCCTATTTACCGATTTA T | TTGAGGGTTAGGTGATCTTGCTT  |
| P29 | GGGGATTGATCGAGAAAG        | CCGAAGAGTAACTAGGAC       |
| P30 | TGCCGTTTCGTGTCGTAATTCAGC  | TTGTCACCGTCATTGTGAGTCCA  |
| P31 | TCGGGGCCACAAGTCAATAC      | TCTGGATAAGGGTTGGGGGT     |
| P32 | GTTACGGAGGAGCGGAAGAG      | GGCTATGAGCATTATTTTGGTGGA |
| P33 | AGTTCACGTGAGATCCTAGTGT    | CAACAGGGGAGAATGACGCT     |
| P34 | CTTGCCCAGAGCCAAGGTAT      | AGCAAAACCTATGCTTTTACTGC  |
| P35 | TTGATGGACACTAGGCAAGGT     | GTGAGGAGCAATTGGCGTTT     |
| P36 | GGCCTCCTTGAACAGCTAGA      | GCAGTGACCGAAGTGCAGAT     |
| P37 | TGAGCGGCAATGCATCTGTA      | AGGAGAGAGCGCGAAAAACA     |
| P38 | AATGGCGGCAAATCTCGCTA      | TGAGGATTTAGGGGCTTGG      |
| P39 | GATCACGGTCACCATCACGA      | CAAGAGCGAGCATCCCAGAG     |
| P40 | GGTTGTGGTTTCCTGACGTTG     | CCGTAACCCCAGTTCGTAGT     |
| P41 | ATCCGAAACCGCCTCCTTAC      | GGGGTTTGGTGCAGGTACT      |
| P42 | TCGGGGCCACAAGTCAATAC      | TCTGGATAAGGGTTGGGGGT     |
| P43 | CTTGCCCAGAGCCAAGGTAT      | AGCAAAACCTATGCTTTTACTGC  |
| P44 | GAGAGATGAGCACAGCGTCA      | TCGATGGCGAAACCCAAGTT     |

---

---

|     |                           |                            |
|-----|---------------------------|----------------------------|
| P45 | ACCTGCAAAGCAACCTAGTGA     | GCCCCAATCGAAGTTTCACC       |
| P46 | TTGATGGACACTAGGCAAGGT     | GTGAGGAGCAATTGGCGTTT       |
| P47 | TTTTCCACCTCAGAGGGCAG      | TTGCACATTGTCGTTTCCCA       |
| P48 | GGGAATCCTCCACCGTTGAT      | TCCTGAAGCCGAGTCTCCTA       |
| P49 | ATGAGTGCACCACATCCACC      | ATTGCAGCATTAGGAGGCGG       |
| P50 | GGCCTCCTTGAACAGCTAGA      | GCAGTGACCGAAGTGCAGAT       |
| P51 | AAGACAGTGGTGGTAGTGGC      | TAGAGGAAAGTAGTGCGGCG       |
| P52 | GAATCCACCATCACCAGGCA      | GTTTTCGATGCCAACTGCGA       |
| P53 | GGTTGTGGTTTCCTGACGTTG     | CCGTAACCCCAGTTCGTAGT       |
| P54 | TGAGTAATTGAAAATGGAGATCGAC | TACTCCCAACCAGCAATCCG       |
| P55 | ATGCTTGGGACATTTGACACATT   | CGAGTCTAAAGCCAACTGGGA      |
| P56 | CAGAACGTGATCCCCGACTT      | CTGCATAGGATCGCAGTGGT       |
| P57 | GGGAACAACCAATGGCCTCA      | TGCATATCCGGATCCTCCCT       |
| P58 | GACACAAGTCGTTCCAACCA      | GTGTGTGACTGAGCCTTCCA       |
| P59 | ACCGCGTAACCCCAATTATGT     | AGGATCTTGCAATATTTTCATCCTGT |
| P60 | TGCACCTTCCATCATGAACGT     | ACTACTAACCTAGCAAATGTCA     |
| P61 | TCACCCCTCTCACACAATGC      | GTCAACAAAGTCGGCTGCAG       |
| P62 | TGTCAAATACAATTGCAAGGCGT   | TGTCATCGACTAACGGCCAT       |
| P63 | CCCCCTTCTAAACACGTGGA      | TTGAAAATGCCCCTTAAGTTGTT    |
| P64 | TTCGATCAAAGGTTTATTGTCTCTT | CACGATCGCGCACCTTTTTA       |
| P65 | TGACACAAAGAGAACACTCAAGA   | TGTCTGTGAGAGAGCGAAACA      |
| P66 | TCCCTCACAGCTTGCAAAAA      | TGGCCTATGTTAGTCAGGGAC      |
| P67 | GGACGTTCCCAATGCTCACA      | AGGGCGGAGTGACAAATCAG       |
| P68 | AGAAAAAGACTGGCTGGTGGT     | TCAAGGAGCGTCGAGGAGTA       |
| P69 | ACCGACTTTGCAGATTAGAA      | CCTAGAGAAATAAAACGCCG       |
| P70 | CCCCCAAACCTTCTGGTTTT      | TCGGTCTCTTGACCTTTTGG       |
| P71 | GAGTAAGGCTCCCTAGAGTTCA    | TTGTATGATGGGCCGGATGA       |
| P72 | GTGCCAACAAAGAAAAGAGG      | GATGCCTAGTACAATTTTGGAG     |
| P73 | TTCGGTAATGTTTGTTGACG      | CCTCTGCTTTGTTTTATTTGGC     |

---

|     |                       |                        |
|-----|-----------------------|------------------------|
| P74 | GAGAGCATAAGGATGAGTGT  | CTCATCCACCTTTCATGACT   |
| P75 | GGGTCCCAAAACTTCTCAAA  | GCTTGTGATGGTTGTACTTTGT |
| P76 | CCAGATGAGTAAACCATCACT | AGAAGCTAAGCAATGCGATA   |
| P77 | TCGTGTACGTACCCTAAATC  | GGTGGAACGTAGATGGTAAC   |
| P78 | TAAAGGGGAGACGAGCTATT  | GTTATACGAGTCGTTGGCTA   |
| P79 | TCAGAAAGCATACAACATGA  | CCTTTGTTTCACATTCTCTGTA |
| P80 | AGTTCGGCGGGAAGATGAAT  | AGTAGTCCCGGAGCTCACAT   |

**Table S2 Information of 10 SSR primers**

| Primers | Sequence (5'-3')                                        | Size (bp) |
|---------|---------------------------------------------------------|-----------|
| P1      | P: TTTCTGTCTGGACTTGGTAA<br>R: CCCTTTCACCTTCAACGTCT      | 220       |
| P3      | P: ATCCACATTGACATAGCCAGA<br>R: GATTATTAGTCCACCCACCCT    | 220       |
| P6      | P: GGTATGACACTTTGCGGTATT<br>R: GTATCGACAAGAAACATCCAGA   | 222       |
| P12     | P: GAACTTGTAGGCCTTTTGCG<br>R: AAACCAGCTGGAGCAAGAGA      | 222       |
| P22     | P: GTAGGAGGGTTGTATTGTGG<br>R: ATTTCTCTTCACACGAGCTT      | 218       |
| P58     | P: GACACAAGTCGTTCCAACCA<br>R: GTGTGTGACTGAGCCTTCCA      | 216       |
| P59     | P: ACCGCGTAACCCCATATGT<br>R: AGGATCTTGCAATATTTTCATCCTGT | 222       |
| P60     | P: TGCACCTTCCATCATGAACGT<br>R: ACTCACTAACCTAGCAAATGTCA  | 186       |
| P64     | P: TTCGATCAAAGGTTTATTGTCTCTT<br>R: CACGATCGCGCACCTTTTTA | 224       |
| P70     | P: CCCCCAACTTTCTGGTTTT                                  | 224       |

---

R: TCGGTCTCTTGACCTTTTGG

---

**Table S3 Genetic diversity of Tartary buckwheat population**

| Accession | <i>Na</i> | <i>Ne</i> | <i>I</i> | <i>Ho</i> | <i>He</i> | <i>Nei</i> |
|-----------|-----------|-----------|----------|-----------|-----------|------------|
| BG        | 2.000     | 1.690     | 0.510    | 0.333     | 0.366     | 0.320      |
| BY        | 1.750     | 1.540     | 0.425    | 0.107     | 0.307     | 0.285      |
| DS        | 1.750     | 1.547     | 0.451    | 0.139     | 0.372     | 0.310      |
| EL        | 1.182     | 1.182     | 0.126    | 0.182     | 0.182     | 0.091      |
| GH        | 1.500     | 1.400     | 0.314    | 0.208     | 0.292     | 0.219      |
| GT        | 1.917     | 1.662     | 0.526    | 0.104     | 0.398     | 0.355      |
| JA        | 2.500     | 1.797     | 0.608    | 0.215     | 0.377     | 0.356      |
| JK        | 2.250     | 1.805     | 0.530    | 0.233     | 0.337     | 0.303      |
| JL        | 2.500     | 1.905     | 0.703    | 0.094     | 0.465     | 0.435      |
| JW        | 1.083     | 1.083     | 0.058    | 0.083     | 0.083     | 0.042      |
| KW        | 1.917     | 1.733     | 0.519    | 0.333     | 0.393     | 0.344      |
| LL        | 1.546     | 1.479     | 0.335    | 0.136     | 0.303     | 0.227      |
| LW        | 2.000     | 1.796     | 0.517    | 0.146     | 0.363     | 0.316      |
| NL        | 1.636     | 1.606     | 0.410    | 0.273     | 0.409     | 0.284      |
| NW        | 1.333     | 1.333     | 0.231    | 0.333     | 0.333     | 0.167      |
| NY        | 1.250     | 1.157     | 0.136    | 0.104     | 0.104     | 0.091      |
| TB        | 2.083     | 1.653     | 0.518    | 0.233     | 0.357     | 0.322      |
| TT        | 1.333     | 1.246     | 0.176    | 0.104     | 0.128     | 0.112      |
| WE        | 1.083     | 1.083     | 0.058    | 0.083     | 0.057     | 0.042      |
| WM        | 2.250     | 2.082     | 0.712    | 0.167     | 0.556     | 0.463      |
| WR        | 1.833     | 1.547     | 0.432    | 0.188     | 0.319     | 0.279      |
| YC        | 1.750     | 1.579     | 0.437    | 0.146     | 0.339     | 0.297      |
| YG        | 2.083     | 1.846     | 0.587    | 0.222     | 0.450     | 0.375      |
| YL        | 1.364     | 1.327     | 0.242    | 0.121     | 0.206     | 0.172      |

|      |       |       |       |       |       |       |
|------|-------|-------|-------|-------|-------|-------|
| YW   | 2.000 | 1.731 | 0.522 | 0.133 | 0.367 | 0.328 |
| YY   | 1.250 | 1.120 | 0.112 | 0.118 | 0.080 | 0.072 |
| ZH   | 2.000 | 1.676 | 0.510 | 0.111 | 0.351 | 0.322 |
| ZJ   | 1.750 | 1.424 | 0.383 | 0.146 | 0.283 | 0.247 |
| ZR   | 1.500 | 1.472 | 0.318 | 0.125 | 0.292 | 0.219 |
| Mean | 1.738 | 1.535 | 0.393 | 0.170 | 0.306 | 0.255 |
